# Supplementary material for: GHSR DNA hypermethylation is a common epigenetic alteration of high diagnostic value in a broad spectrum of cancers
Source: PubMed Central journal article supplement (PMC4414200; doi:10.18632/oncotarget.2759), 2015-02-21
Supplement: oncotarget-06-4418-s001.pdf [file oncotarget-06-4418-s001.pdf]

## SUPPLEMENTARY FIGURE AND TABLES

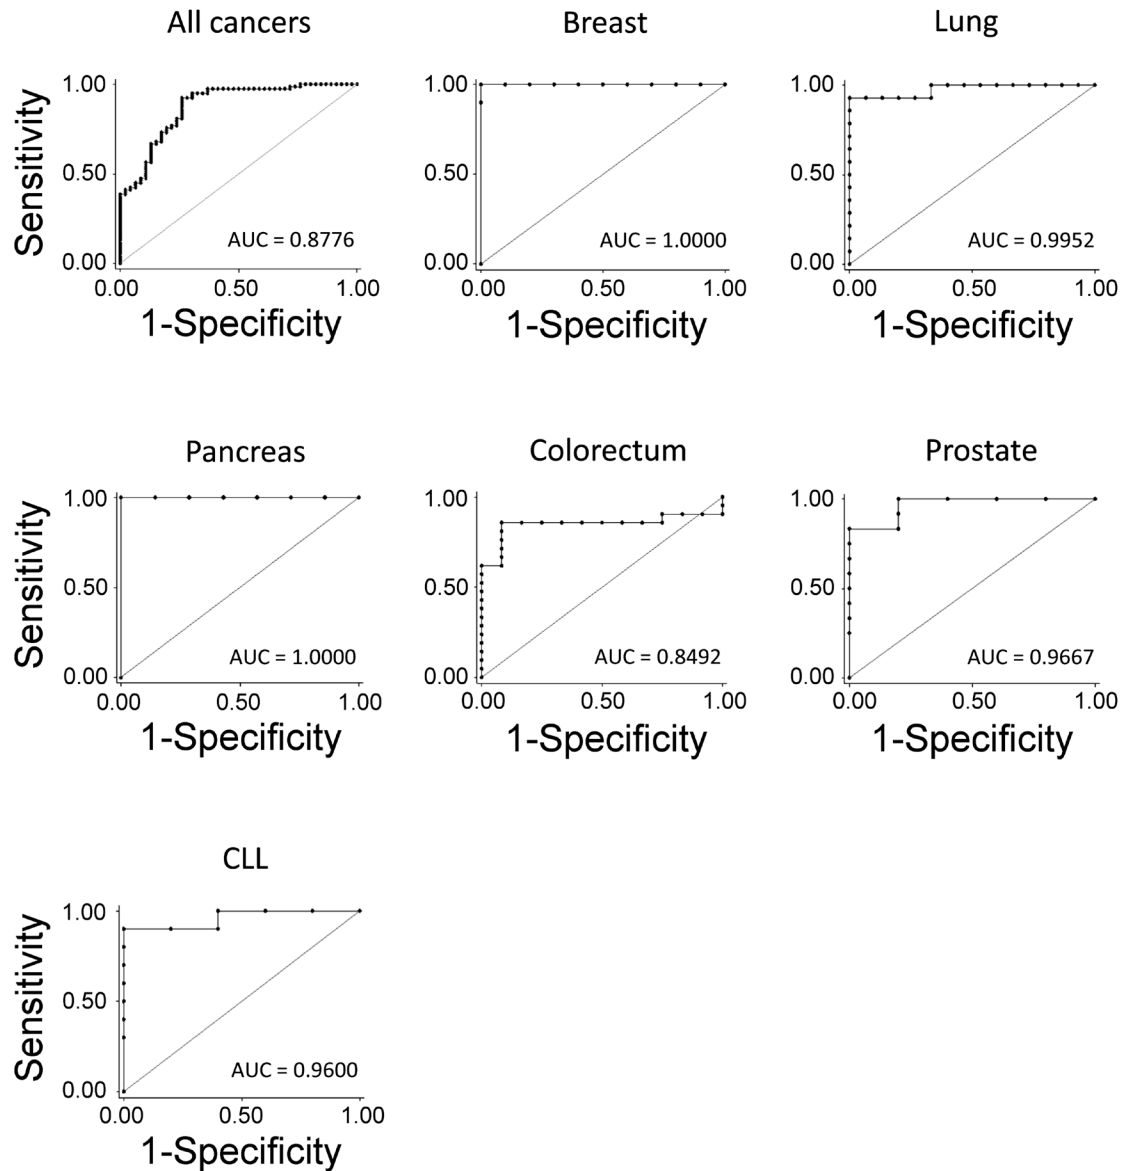

**Supporting Information Figure 1: ROC curves using *GHSR* methylation.** Cancers were compared with normal-appearing tissue samples for pooled 137 specimens as well as separately for each tumor entity. Methylation degree of CpG *GHSR*\_1620 was used for calculations for all cancers but colorectal and lung cancers for which average of methylation levels of the 4 exonic CpGs (marked in Figure 1) is used.

**Supporting Information Table 1: Sequences of the PCR and pyrosequencing primers used in this study**

| Gene symbol | Primer sequences (5'-3')<br>F: PCR forward; R: PCR reverse;<br>S: pyrosequencing; bio: biotinylation;<br>up: upstream; dwn: downstream CGI | Amplicon length,<br>bp | Number of CpGs<br>quantified by<br>pyrosequencing |
|-------------|--------------------------------------------------------------------------------------------------------------------------------------------|------------------------|---------------------------------------------------|
| GHSR-up-F   | ATTGTTTGTGAAAGGTAAGTATAAA                                                                                                                  | 427                    |                                                   |
| GHSR-up-R   | bio-ACACTAACAAAATAACCCTCTAAAC                                                                                                              |                        |                                                   |
| GHSR-up-S1  | GTATTTAATTGAGGGGGA                                                                                                                         |                        | 6                                                 |
| GHSR-up-S3  | GTGGGAGTTTGTGTTTGT                                                                                                                         |                        | 4                                                 |
| GHSR-up-S6  | GTGATAGGGAAGTTATTTTTTTAG                                                                                                                   |                        | 5                                                 |
| GHSR-dwn-F  | GATTTGGATTGGGATGTTTTTTT                                                                                                                    | 422                    |                                                   |
| GHSR-dwn-R  | bio-CCCTTAATAACCACCACCTTAAC                                                                                                                |                        |                                                   |
| GHSR-dwn-S2 | ATTATGTTGGTGGTGT                                                                                                                           |                        | 5                                                 |
| GHSR-dwn-S4 | GAGTTGTTGTAGT                                                                                                                              |                        | 7                                                 |

**Supporting Information Table 2: CpG sites of *GHSR* interrogated by bisulfite pyrosequencing**

| CpG ID     | Sequencing primer | Distance to TSS* |
|------------|-------------------|------------------|
| GHSR_-1620 | S1                | -1620            |
| GHSR_-1607 |                   | -1607            |
| GHSR_-1599 |                   | -1599            |
| GHSR_-1596 |                   | -1596            |
| GHSR_-1568 |                   | -1568            |
| GHSR_-1565 |                   | -1565            |
| GHSR_-1530 | S3                | -1530            |
| GHSR_-1512 |                   | -1512            |
| GHSR_-1503 |                   | -1503            |
| GHSR_-1490 |                   | -1490            |
| GHSR_-1458 | S6                | -1458            |
| GHSR_-1455 |                   | -1455            |
| GHSR_-1448 |                   | -1448            |
| GHSR_-1431 |                   | -1431            |
| GHSR_-1399 |                   | -1399            |
| GHSR_+160  | S4                | +160             |
| GHSR_+162  |                   | +162             |
| GHSR_+165  |                   | +165             |
| GHSR_+174  |                   | +174             |
| GHSR_+178  |                   | +178             |
| GHSR_+193  |                   | +193             |
| GHSR_+205  |                   | +205             |
| GHSR_+249  | S2                | +249             |
| GHSR_+251  |                   | +251             |
| GHSR_+257  |                   | +257             |
| GHSR_+259  |                   | +259             |
| GHSR_+266  |                   | +266             |

\* TSS: transcriptional start site according to the Database of Transcriptional Start

## SUPPORTING INFORMATION REFERENCE

1. Yamashita R, Sathira NP, Kanai A, Tanimoto K, Arauchi T, Tanaka Y, Hashimoto S, Sugano S, Nakai K, Suzuki. Genome-wide characterization of transcriptional start sites in humans by integrative transcriptome analysis. *Genome Res.* 2011; 21:775–789.
